# Supplementary material
Source: publisher figshare collection journal article supplement (https://gsajournals.figshare.com/ndownloader/files/14127257)
Supplement: Supplementary file 1 [file 14127257]

## Sheet: Sheet1
Name in F. assafoetida	Abbreviation
oases3_k25_Locus_11029_Transcript_9_1	Ferula assafoetida 4CL-like1
oases3_k25_Locus_4163_Transcript_5_1	Ferula assafoetida 4CL-like2
oases3_k37_Locus_4395_Transcript_4_1	Ferula assafoetida 4CL-like3
oases3_k43_Locus_7570_Transcript_3_1	Ferula assafoetida 4CL-like4
oases6_k25_Locus_30933_Transcript_3_1	Ferula assafoetida 4CL-like5
TRINITY_DN75605_c0_g1_i1	Ferula assafoetida 4CL-like6
oases6_k37_Locus_13492_Transcript_4_1	Ferula assafoetida C2'H
oases2_k37_Locus_48872_Transcript_1_1	Ferula assafoetida CHI-like1
oases3_CL10153Contig1_2	Ferula assafoetida CHI-like2
oases3_k49_Locus_9379_Transcript_12_1	Ferula assafoetida CHI-like3
oases6_k25_Locus_14487_Transcript_14_1	Ferula assafoetida CHI-like4
oases6_k37_Locus_61759_Transcript_1_1	Ferula assafoetida CHI-like5
oases2_k25_Locus_50568_Transcript_1_1	Ferula assafoetida CHS-like1
oases3_k25_Locus_15765_Transcript_6_1	Ferula assafoetida CHS-like2
oases2_k25_Locus_16219_Transcript_3_1	Ferula assafoetida FH-like1
oases3_k43_Locus_8457_Transcript_7_1	Ferula assafoetida FH-like2
oases6_k37_Locus_57857_Transcript_1_1	Ferula assafoetida FH-like3
oases6_k49_Locus_12143_Transcript_7_2	Ferula assafoetida FNS
oases2_k31_Locus_1941_Transcript_18_1	Ferula assafoetida PAL-like1
oases3_k43_Locus_21058_Transcript_1_1	Ferula assafoetida PAL-like2
TRINITY_DN121792_c0_g1_i1	Ferula assafoetida PAL-like3
TRINITY_DN38110_c0_g8_i1	Ferula assafoetida PAL-like4
oases2_k25_Locus_8995_Transcript_3_1	Ferula assafoetida PAL-like5
